# Supplementary material
Source: PubMed Central journal article supplement (PMC5373852)
Supplement: NIHMS729238-supplement-Supplemental.pdf [file NIHMS729238-supplement-Supplemental.pdf]

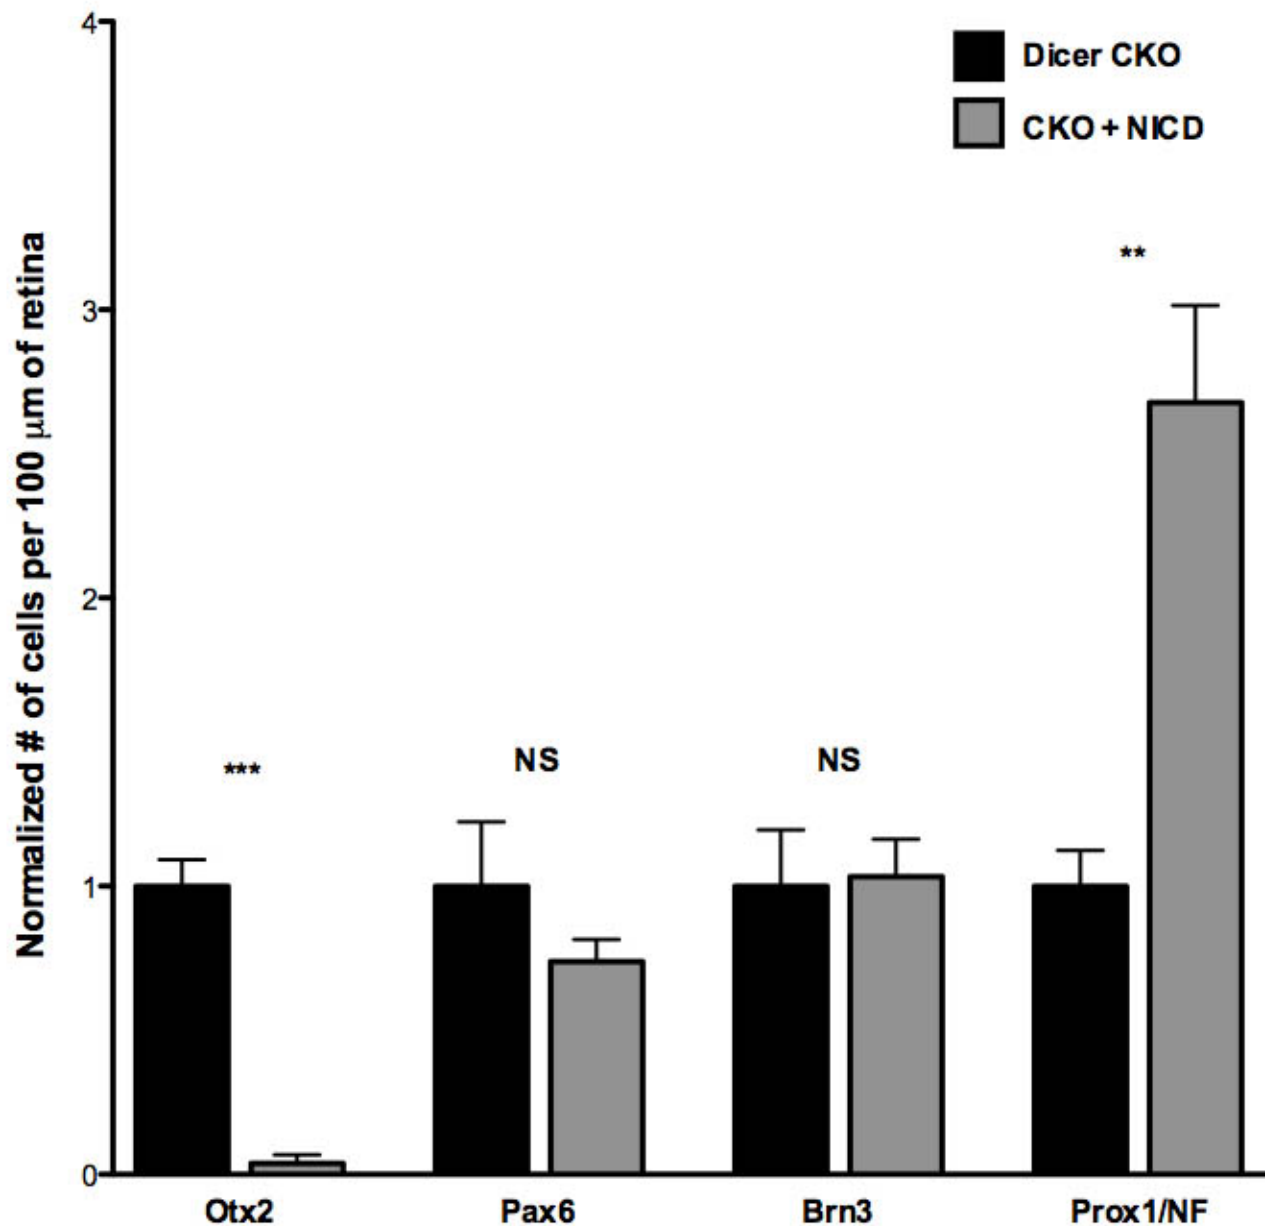

**Supplementary Figure 1.** Quantification of immunofluorescence staining of P0 Dicer CKO versus Dicer CKO+NICD retinas, normalized to Dicer CKO counts. Counts of Otx2<sup>+</sup> photoreceptors, Pax6<sup>+</sup> amacrine cells, Brn3<sup>+</sup> ganglion cells, and Prox1<sup>+</sup>/Neurofilament<sup>+</sup> horizontal cells. Error bars indicate mean ± SEM. P-value summary: NS- Not significant; ★ < 0.05; ★★ < 0.01; ★★★ < 0.001

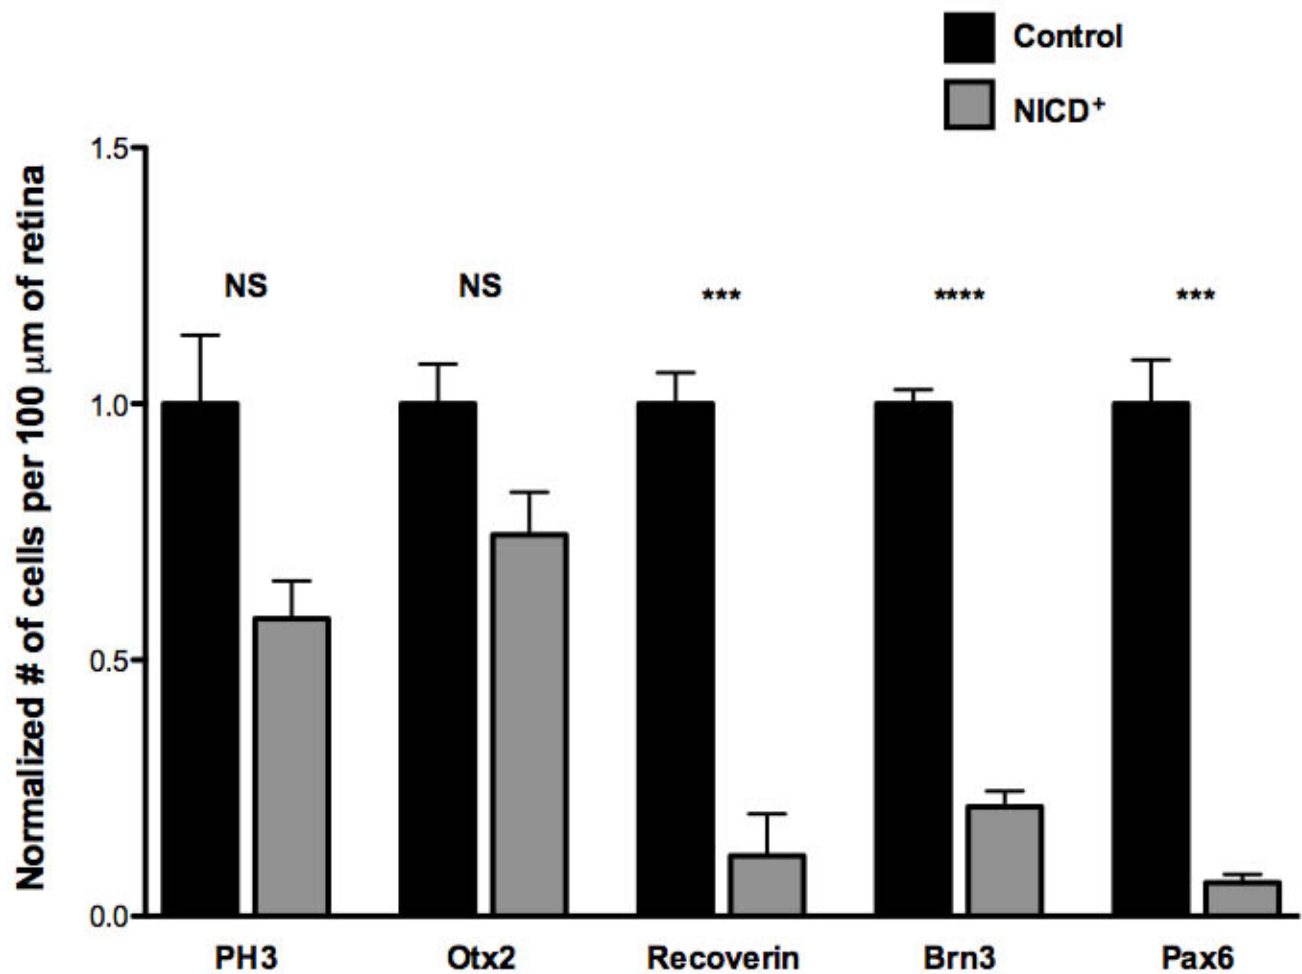

**Supplementary Figure 2.** Quantification of immunofluorescence staining of P0 NICD<sup>+</sup> versus control retinas, normalized to average of control counts. Counts of PH3<sup>+</sup> mitotic cells, Otx2<sup>+</sup> photoreceptors, recoverin<sup>+</sup> photoreceptors, Brn3<sup>+</sup> ganglion cells at the vitreal surface, and Pax6<sup>+</sup> amacrine cells. Error bars indicate mean  $\pm$  SEM. P-value summary: NS- Not significant; \* < 0.05; \*\* < 0.01; \*\*\* < 0.001, \*\*\*\* < 0.0001

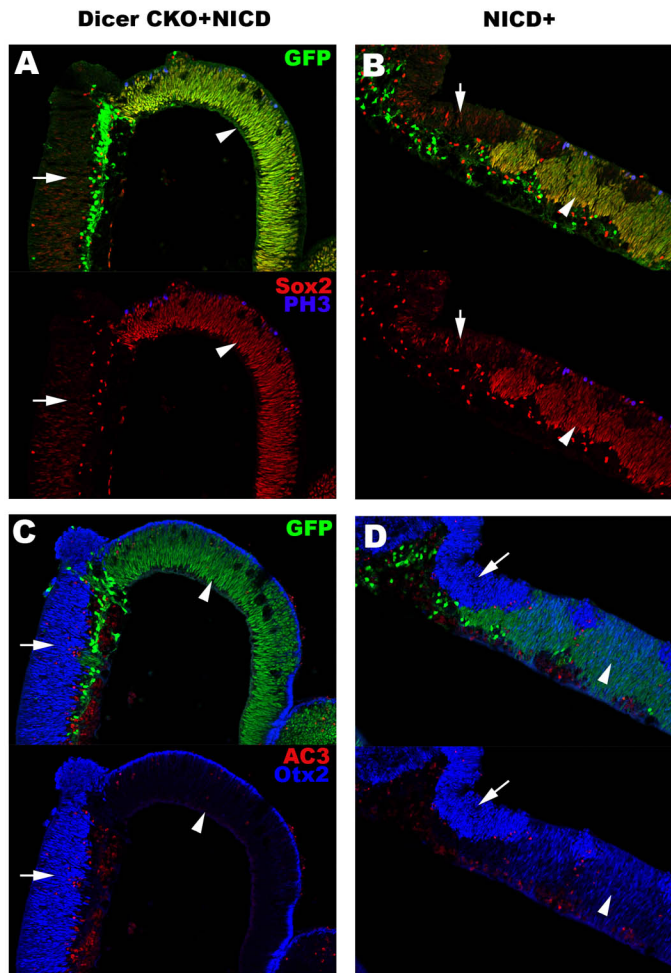

**Supplementary Figure 3.** Immunofluorescence staining of P0 Dicer CKO+NICD and NICD+ retinas after 48h in DAPT. **A-B**, Staining for the progenitor markers Sox2 (red) and PH3 (blue) is reduced in wild type areas (arrows), but is rescued in NICD-expressing areas (green, arrowheads) in both Dicer CKO+NICD (A) and NICD+ (B) retinas. **C-D**, Staining for the photoreceptor marker Otx2 (blue) is increased in wild type areas (arrows), but is absent from Dicer CKO+NICD areas (C, green, arrowheads), and comparatively reduced in NICD+ areas (D, green, arrowheads). Staining for AC3 (red) shows no induction in both Dicer CKO+NICD and NICD+ areas (green, arrowheads).

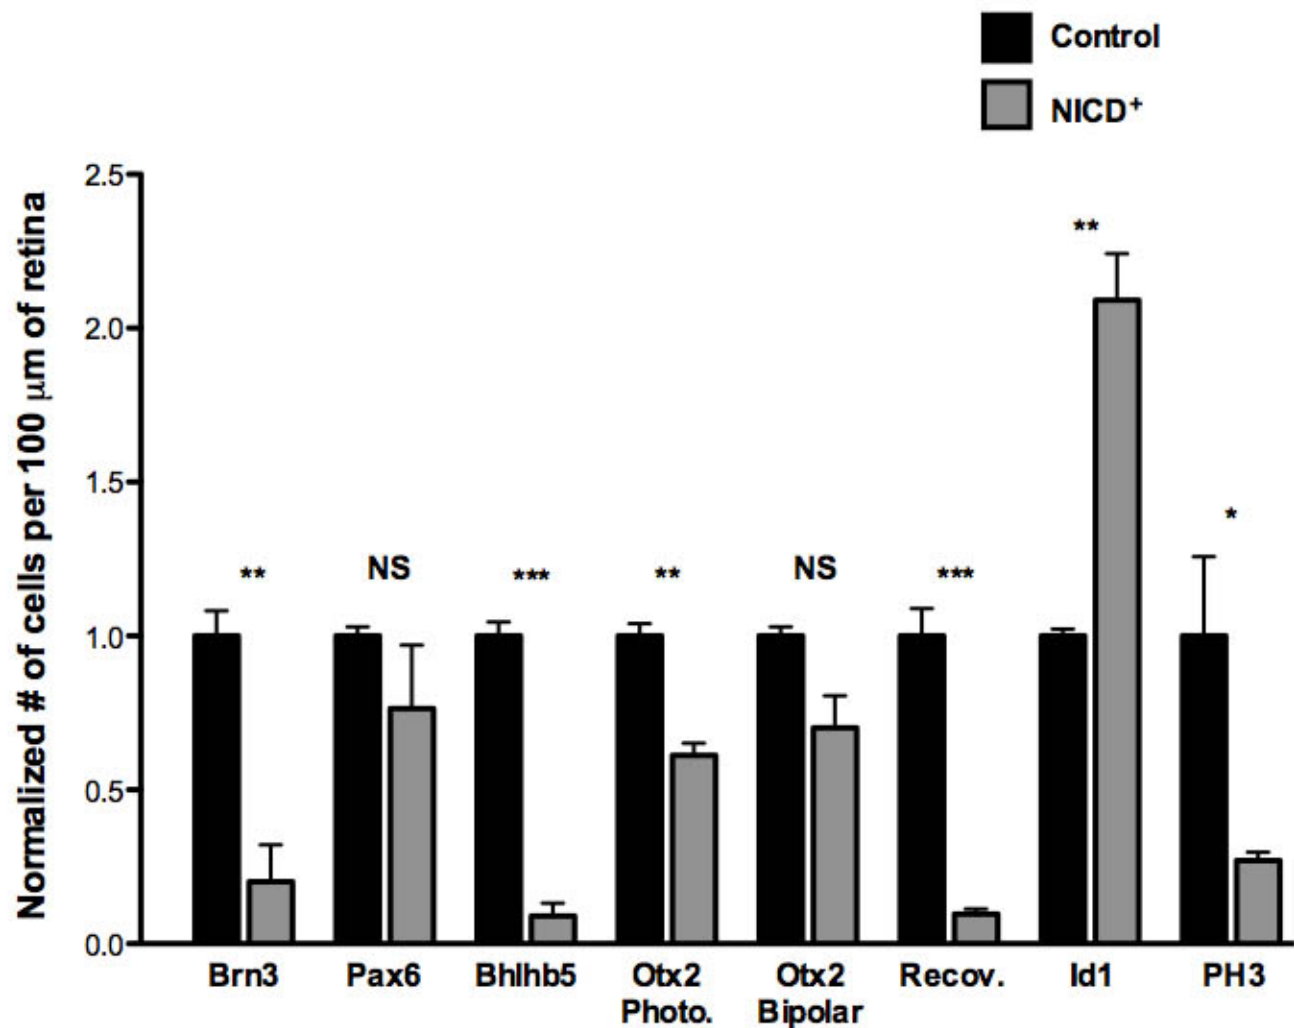

**Supplementary Figure 4.** Quantification of immunofluorescence staining of P5 NICD<sup>+</sup> versus control retinas, normalized to control counts. Counts of Brn3<sup>+</sup> ganglion cells, Pax6<sup>+</sup> amacrine cells, Bhlhb5<sup>+</sup> mature amacrine cells, Otx2<sup>+</sup> photoreceptors, bright Otx2<sup>+</sup> bipolar cells, recoverin<sup>+</sup> photoreceptors, Id1<sup>+</sup> Müller glia, and PH3<sup>+</sup> mitotic cells. All counts were done in central retina, except PH3, which was counted in the most peripheral 100  $\mu\text{m}$  of retina. Error bars indicate mean  $\pm$  SEM. P-value summary: NS- Not significant; \* < 0.05; \*\* < 0.01; \*\*\* < 0.001
